# Supplementary material for: Highly sensitive detection of superoxide dismutase based on an immunoassay with surface-enhanced fluorescence
Source: Royal Society of Chemistry journal article supplement (doi:10.1039/c3an00471f), 2013-01-01
Supplement: c3an00471f.pdf [file c3an00471f.pdf]

Supplementary material (ESI) for Analyst  
This journal is © The Royal Society of Chemistry 2013

## Electronic Supporting Information

*for*

### Highly sensitive detection of superoxide dismutase based on an immunoassay with surface-enhanced fluorescence

Xiaoming Yang<sup>1,\*</sup>, Yao Dou<sup>1</sup>, Shanshan Zhu

*College of Pharmaceutical Sciences, Southwest University, Chongqing 400716, China*

<sup>1</sup>*Both authors contributed equally to this work.*

*\*To whom correspondence should be addressed. Tel: 86-23-68251225;*

*Fax: 86-23-68251048; E-mail: ming4444@swu.edu.cn*

#### Characterizations

##### 1. The size of tiopronin-coated silver nanoparticles

As [Figure S1](#) indicated, the tiopronin-coated silver nanoparticles sizes ranged from 13 to 27 nm, indicating their satisfactory sizes according to ref. 19 (J. Phys. Chem. B 2005, 109, 7643-48).

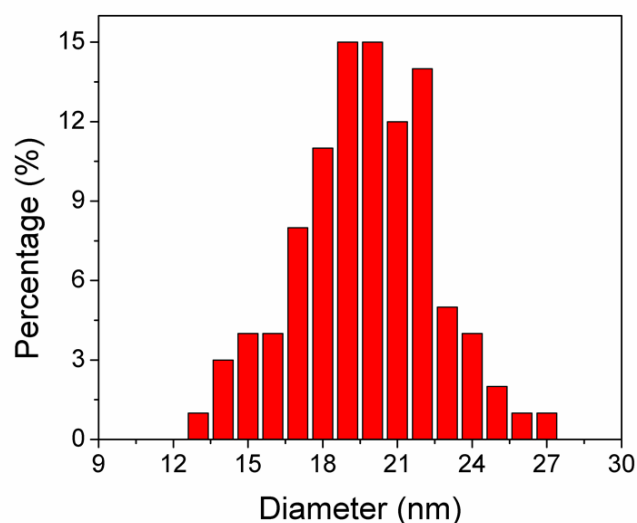

**Figure S1.** Size distribution analysis of tiopronin-coated silver nanoparticles

Supplementary material (ESI) for Analyst  
This journal is © The Royal Society of Chemistry 2013

## 2. The characterization of the fluorescein

As shown in Figure S2, the excitation and emission fluorescence spectra of the fluorescein was 490 nm and 520 nm, respectively.

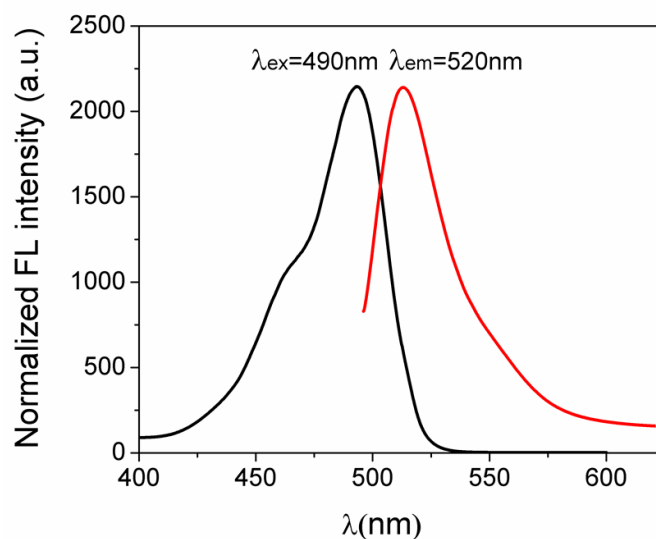

**Figure S2.** Excitation (black) and emission (red) fluorescence spectra of the fluorescein.

## 3. Absorption spectra of tiopronin, tiopronin-coated silver nanoparticles, tiopronin-coated silver nanoparticles/antibody conjugates and FIT-Ag NPs

Figure S3 reveals that the characteristic peaks of tiopronin, silver nanoparticles, anti-SOD antibody and fluorescein were 210 nm, 380 nm, 280nm and 490 nm, suggesting that the FIT-Ag NPs was synthesized successfully.

Supplementary material (ESI) for Analyst  
This journal is © The Royal Society of Chemistry 2013

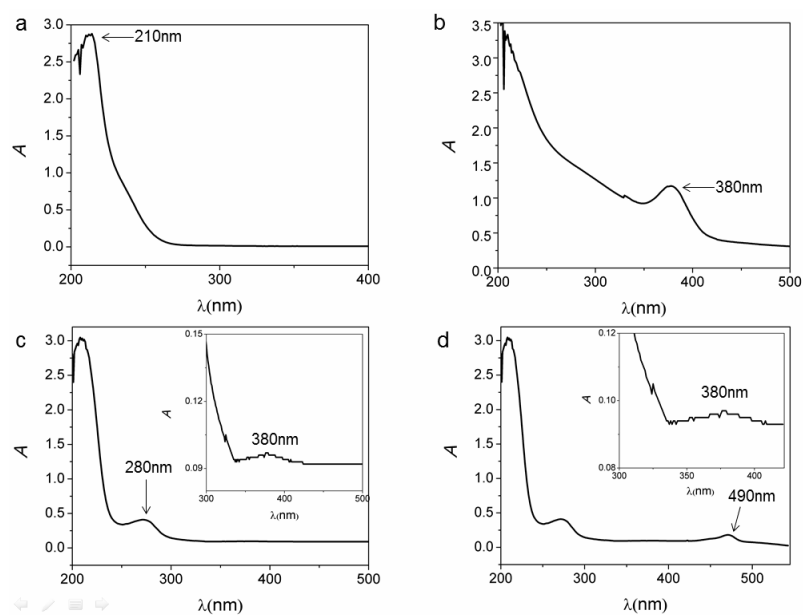

**Figure S3.** Absorption spectra of tiopronin (a), tiopronin-coated silver nanoparticles (b), tiopronin-coated silver nanoparticles/antibody conjugates (c) and FIT-Ag NPs (d).
